# Supplementary material for: AluYb8 insertion polymorphism in the MUTYH gene impairs mitochondrial DNA maintenance and affects the age of onset of IPF
Source: publisher site journal article supplement (doi:10.18632/aging.101793), 2019-02-04
Supplement: Supplementary file [file aging-v11i3-101793-supplementary-material-SD3.pdf]

## SUPPLEMENTARY TABLES

**Supplementary Table 1. The demographic characteristics of the study subjects.**

|        | Healthy controls | IPF patients |
|--------|------------------|--------------|
| Number | 810              | 277          |
| Age*   | 53.96±14.08      | 61.38±12.60  |
| Male   | 421              | 240          |

\* The data represents the mean ± SD.

**Supplementary Table 2. Allele frequency of *AluYb8MUTYH* in IPF and healthy control.**

|   | Allele frequency |                 | P value | OR(95%CI)   |
|---|------------------|-----------------|---------|-------------|
|   | IPF              | Healthy control |         |             |
| A | 325 (58.7%)      | 892 (55.1%)     | 0.15    | 0.86        |
| P | 229 (41.3%)      | 728 (44.9%)     |         | (0.71-1.05) |

**Supplementary Table 3. Primers used in the present study.**

|                      | <b>Primers</b>                     |
|----------------------|------------------------------------|
| <i>β-actin-F</i>     | GATCAAGATCATTGCTCCTCCTG            |
| <i>β-actin-R</i>     | CCTCGGCCACATTGTGAACT               |
| <i>MT-TL1-F</i>      | CACCCAAGAACAGGGTTTGT               |
| <i>MT-TL1-R</i>      | TGGCCATGGGTATGTTGTTA               |
| <i>MT-ND1-F</i>      | AACATACCCATGGCCAACCT               |
| <i>MT-ND1-R</i>      | AGCGAAGGGTTGTAGTAGCCC              |
| MtDNA-F              | TCTAAGCCTCCTTATTCGAGCCGA           |
| MtDNA-R              | TTTCATCATGCGGAGATGTTGGATGG         |
| nDNA (β-actin)-F     | CATTTACTCTGGGTGATGTCTTTCC          |
| nDNA (β-actin)-R     | GGCTATGTCTTAGGGTTGAGGTCTT          |
| <i>ATP6-F</i>        | CCTAGCCCACTTCTTACCACA              |
| <i>ATP6-R</i>        | GCTTGGATTAAGGCGACAG                |
| <i>COX2-F</i>        | CCCCACATTAGGCTTAAAAACAGAT          |
| <i>COX2-R</i>        | TATACCCCGGTCGTGTAGC                |
| <i>POLG-F</i>        | TGACCGAGTAGGCAGTGAGT               |
| <i>POLG-R</i>        | AGGCCCTTGGTGGCAGCGTA               |
| <i>MFN2-F</i>        | GAAGGCTTTCAAGTGAGGAT               |
| <i>MFN2-R</i>        | GGTCTTGCCGCTCTTCACG                |
| <i>ATG7-F</i>        | TTGAAGTTGTTTGCTTCCGTGAC            |
| <i>ATG7-R</i>        | TAGGCAATCTTCAAACCTCATAG            |
| UTR1-B-F             | AGGAGATCTCAGCCGAGCCGCGGTGTACAA     |
| UTR1-B-R             | CCA CTGCAG CCACAGACGACTCAGGCGGGA   |
| UTR2-B-F             | GTTAGATCTTCCCGGGTCCGGCGCGGGGAAGGCA |
| UTR2_P_R             | AAACTGCAGCTCCCGCGAGCTCTAGCGCGCCCGG |
| UTR3_B_F             | CTCAGATCTTCTCGCGGCGGGAACGCGGGGCCT  |
| UTR3_P_R             | ACCCTGCAGCCGCGGCCACGCTGATGAAGAC    |
| <i>GFP-F</i>         | AGTGCTTCAGCCGCTACCC                |
| <i>GFP-R</i>         | AGTTCACCTTGATGCCGTTT               |
| <i>Neo-F</i>         | TGACTGGGCACAACAGACAA               |
| <i>Neo-R</i>         | GGCAGGAGCAAGGTGAGATG               |
| <i>β-actin (M)-F</i> | CCAACCGCGAGAAGATGA                 |
| <i>β-actin (M)-R</i> | CCAGAGGCGTACAGGGATAG               |
